# Supplementary material
Source: Royal Society of Chemistry journal article supplement (https://www.rsc.org/suppdata/books/184973/9781849731621/bk9781849731621-00502/bk9781849731621-00502.pdf)
Supplement: Supplementary file 1 [file bk9781849731621-00502.pdf]

*Analytical Archaeometry: Selected Topics*

Edited by Howell Edwards and Peter Vandenabeele

©The Royal Society of Chemistry 2012

Published by the Royal Society of Chemistry, [www.rsc.org](http://www.rsc.org)

Colour Figures for Chapter 19: *Technology of Production: The Master Potter 'Ali Muhammad Isfahani: Insights into the Production of Decorative Underglaze Painted Tiles in 19<sup>th</sup> Century Iran*

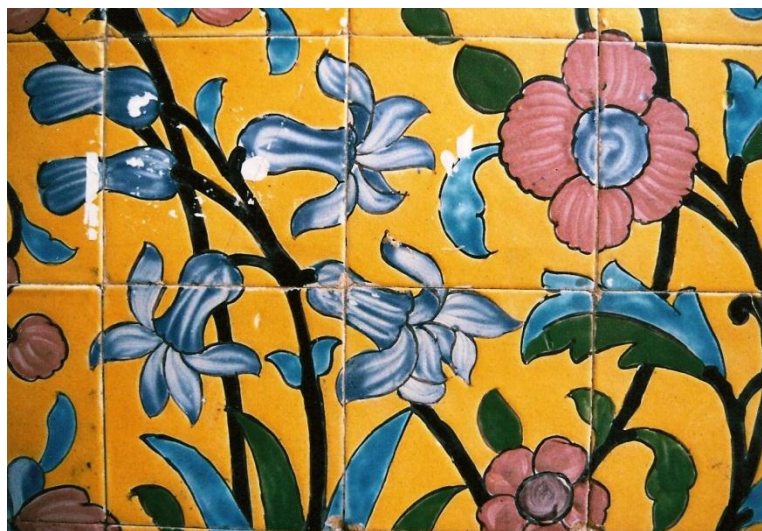

**Figure 19.1** Haft rang tiles at the entrance of the Mosque and Madrasa Sultani (Imam Khomeini) in Kashan, early 19th century, ©F. Voigt, 2005.

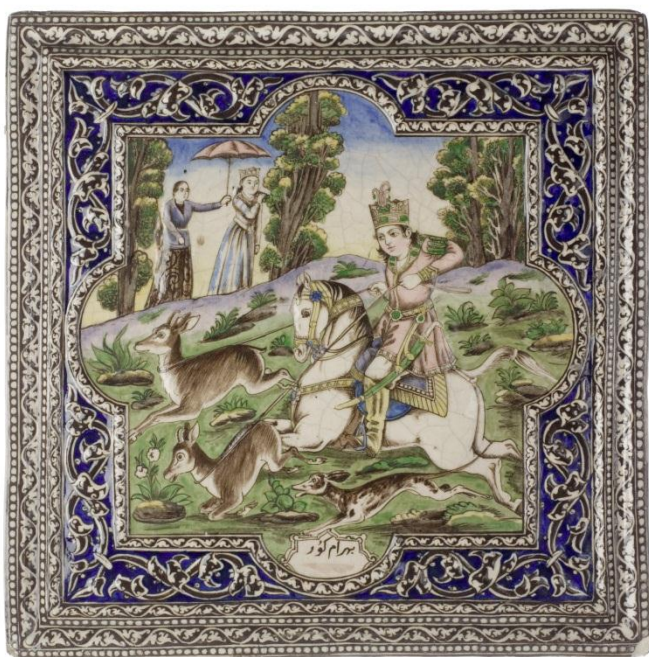

**Figure 19.2** Polychrome underglaze painted tile showing Bahram Gur's hunting prowess, bought from 'Ali Muhammad Isfahani, Tehran, 1887. National Museums Scotland, Edinburgh, acc. no A.1888.105, © National Museums Scotland.

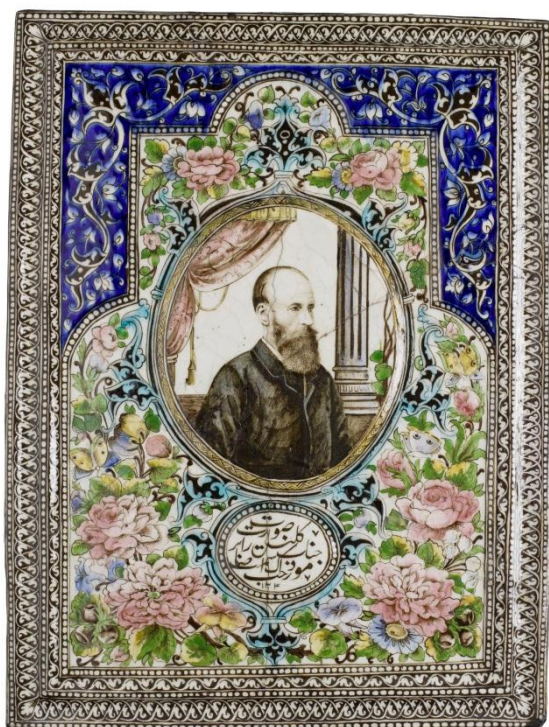

**Figure 19.3** Tile with the portrait of Colonel Robert Murdoch Smith, made by 'Ali Muhammad and dated 1304 AH/AD 1887, private collection, photo © National Museums Scotland.

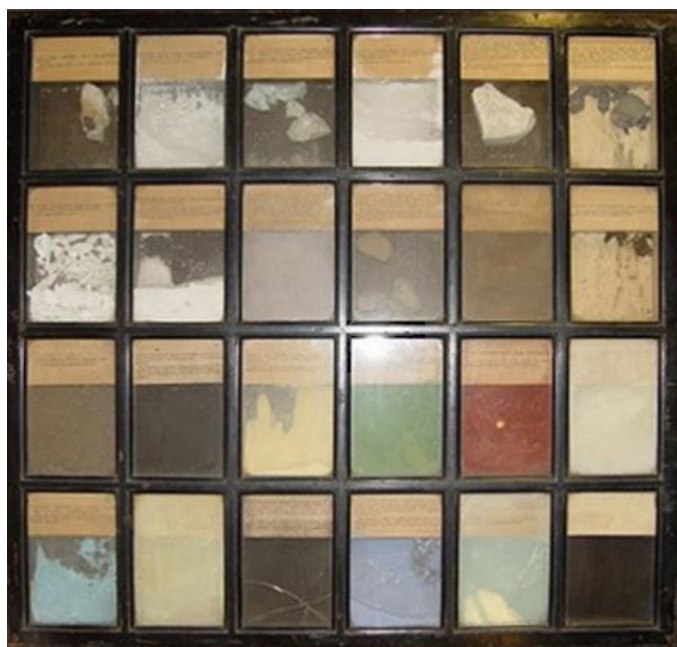

**Figure 19.4** Box with twenty-three samples of body materials, glazes and paints from the Tehran workshop of the master potter Ali Muhammad, Victoria and Albert Museum, London, acc. no 450A to 450W-1888, Courtesy of the Victoria and Albert Museum, London.



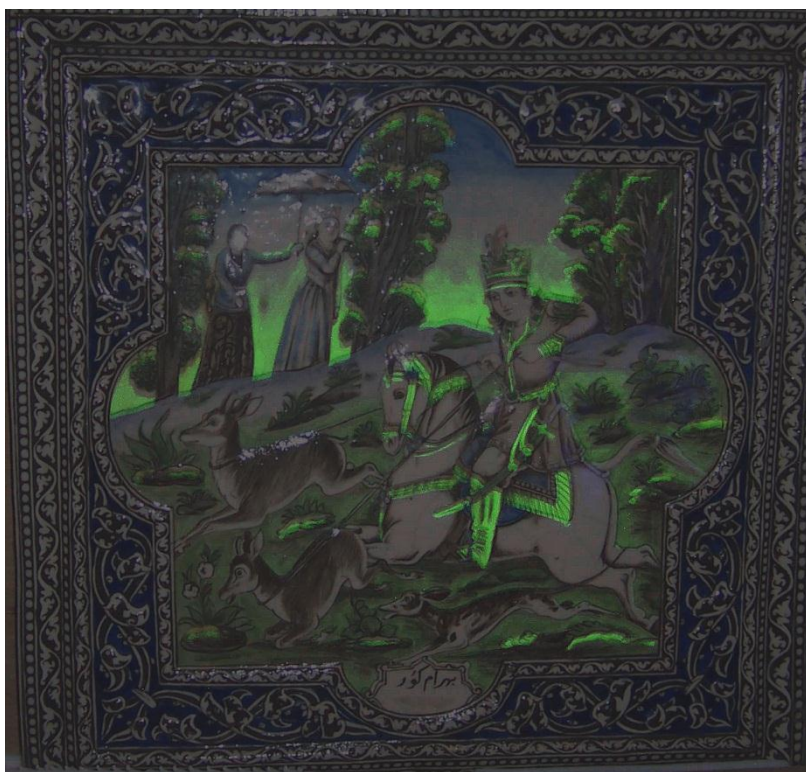

**Figure 19.6** UV image of polychrome underglaze painted tile showing Bahram Gur's hunting prowess, bought from 'Ali Muhammad Isfahani, Tehran, 1887. National Museums Scotland, Edinburgh, acc. no A.1888.105, © National Museums Scotland.

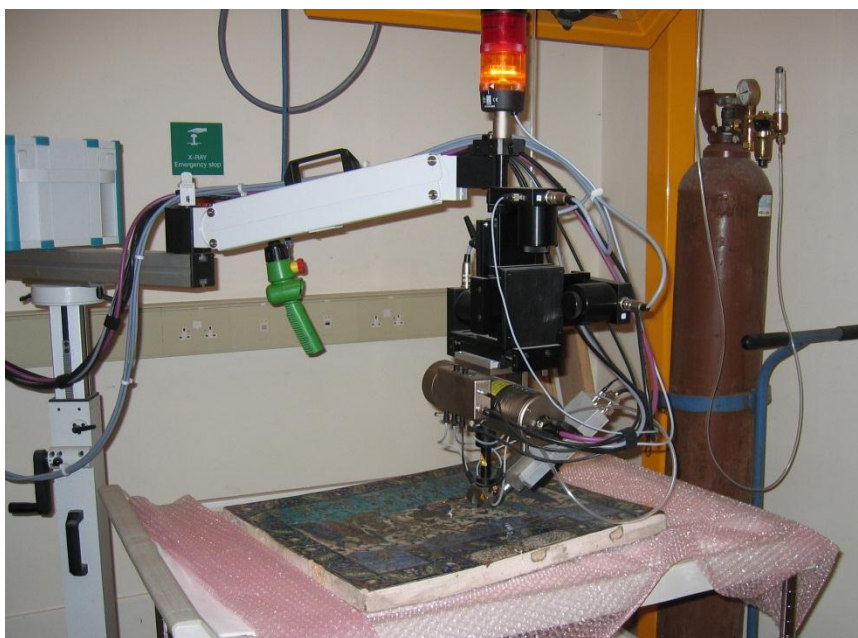

**Figure 19.7** Micro-EDXRF set-up (ArtTax) with He purging used for the analyses of the glaze and the body of the tiles 510–1889 and 511–1889 at the Victoria and Albert Museum, London. Tile shown is 510–1889, © I. Reiche, 2006.
